# Supplementary material
Source: PubMed Central journal article supplement (PMC2909587)
Supplement: NIHMS193728-supplement-supplementary_information.pdf [file NIHMS193728-supplement-supplementary_information.pdf]

DOI: 10.1038/ncb2033

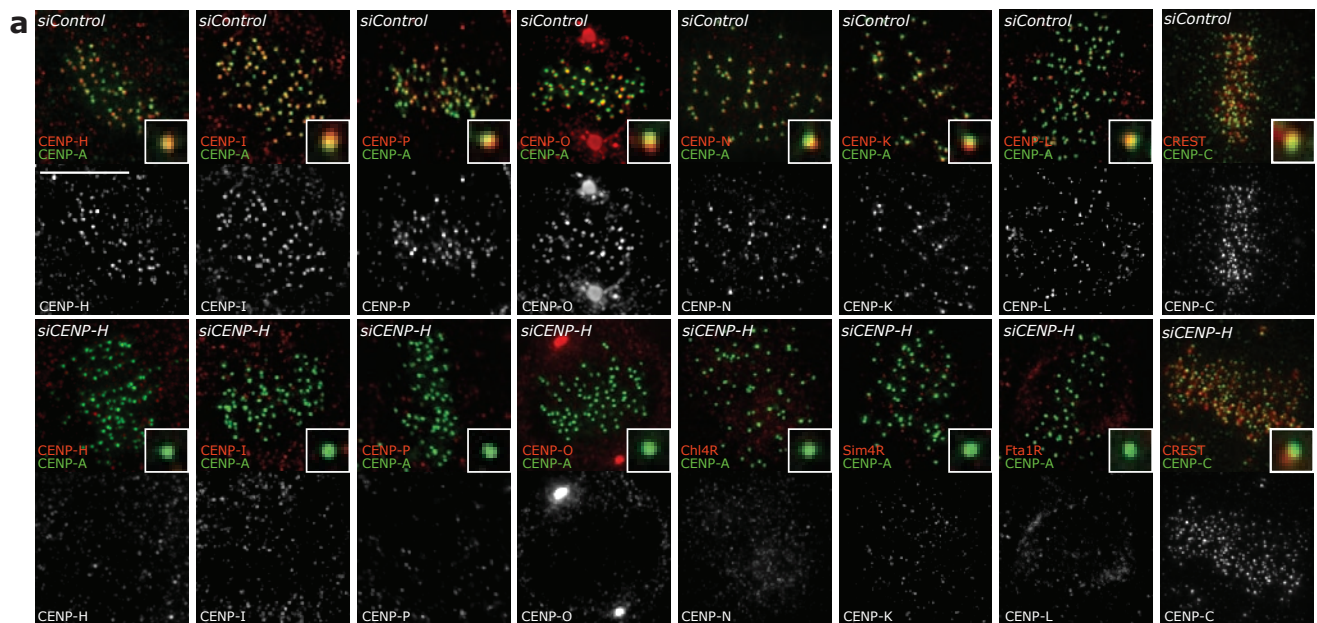

**Figure S1** CENP-H depletion impairs the localization of the whole CENP-A NAC/CAD complex. (a) Representative images of cells treated with *siControl* or *siCENP-H* RNAs stained with CENP-A (green) or CREST antisera (red)

and CENP-H, CENP-I, CENP-P, CENP-O, CENP-N, CENP-K or CENP-L antisera (red) or CENP-C (green). Insets show higher magnification views of a single kinetochore. Scale bar = 10  $\mu$ m

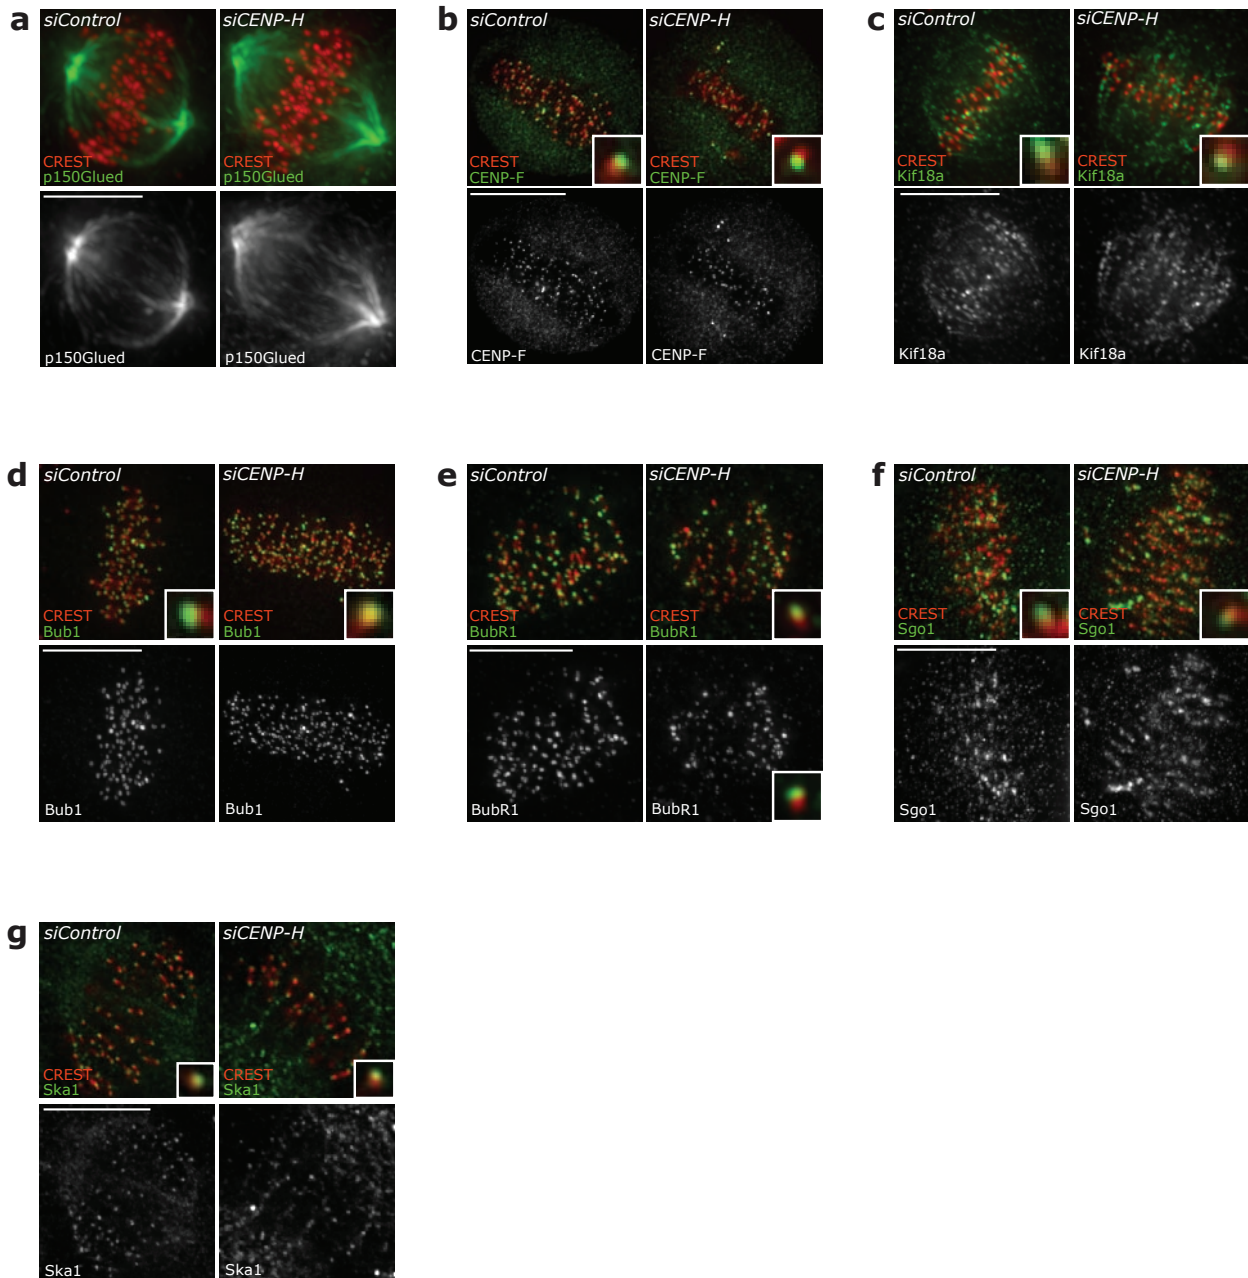

**Figure S2** CENP-H depletion does not have affect the binding of other key kinetochore proteins. (a-g) Representative images of *siControl* or *siCENP-H* RNA-treated cells stained with CREST (red) and p150Glued

(a), CENP-F (b), Kif18a (c), Bub1 (d), BubR1 (e), Sgo1 (f) or Ska1 (g) antisera (green). Insets show higher magnification views of a single kinetochore. Scale bars = 10  $\mu$ m

**a** CENP-H, CENP-I, CENP-O and CENP-P kinetochore intensities

$$I_{\text{KTS}} = \bar{a} - b$$

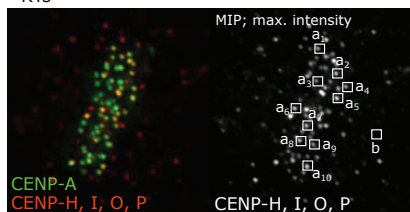

**b** EGFP-CLASP1 intensity at the KTs relative to the spindle poles

$$I_{\text{KTS}} = (\bar{c} - b) / (\bar{a} - b)$$

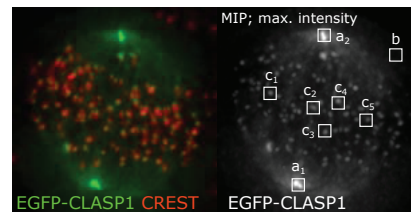

**c** EB1 intensity at the metaphase plate relative to the spindle

$$I_{\text{PLATE}} = (a - b) / (c - b)$$

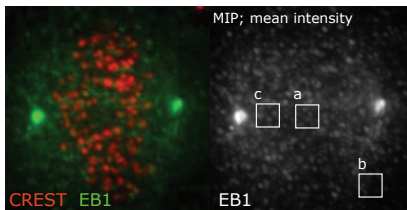

**d** Acetylated tubulin intensity relative to  $\alpha$ -tubulin (based on mean intensity projections; mean intensity)

$$I = a / b$$

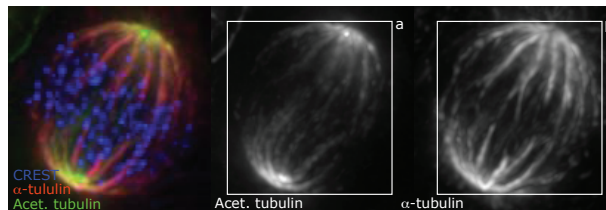

**Figure S3** Immunofluorescence quantifications. **(a)** Scheme for the quantification of the intensity of CENP-H, CENP-I, CENP-P, CENP-O, CENP-L, MCAK and Nnf1R levels at kinetochores. **(b)** Scheme for the quantification of the intensity of EGFP-CLASP1 at the kinetochores. Intensities were normalized

with the poles for each cell. **(c)** Scheme for the quantification of the intensity of EB1 at kinetochores. Intensities were normalized with the spindle intensity. **(d)** Scheme for the quantification of the intensity of acetylated  $\alpha$ -tubulin. The intensities were normalized with the total  $\alpha$ -tubulin intensity. Scale bar = 10  $\mu\text{m}$

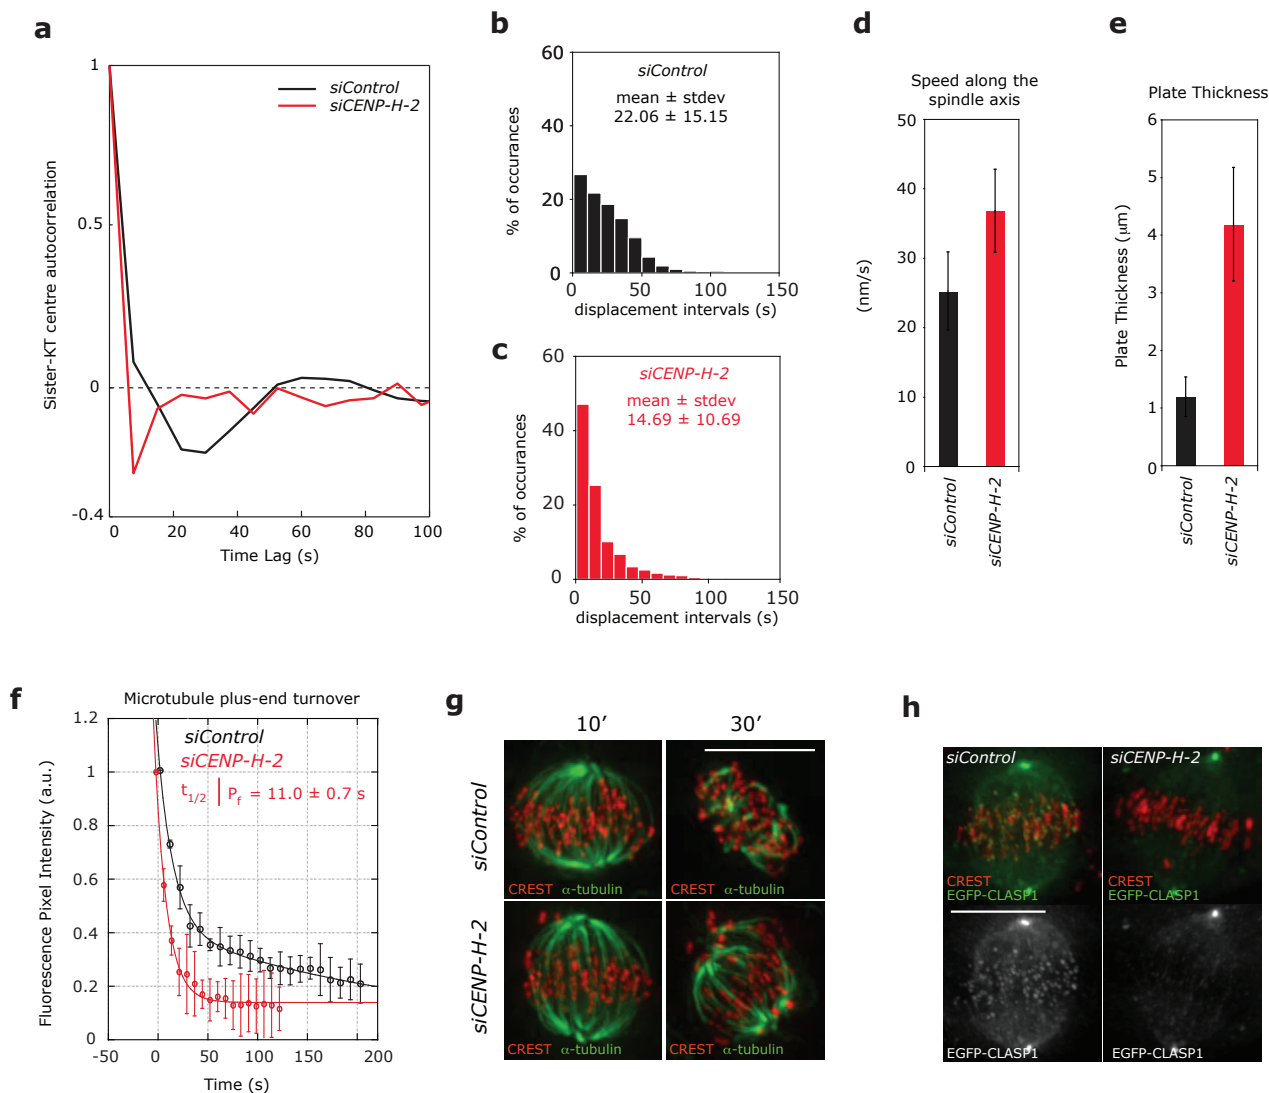

**Figure S4** Key experiments with an alternative CENP-H siRNA oligonucleotide (*siCENP-H-2*) confirm the results of this study (*siCENP-H*). **(a)** Autocorrelation function of translational sister-kinetochore movements along the spindle axis (kinetochore oscillation) of *siControl* (black line; same as in Figure 1b) and *siCENP-H-2* (red line). The autocorrelation function was calculated by combining all aligned sister-kinetochore pairs for each condition (see Supplementary Table 2). **(b-c)** Histograms of the mean interval time between directional switches of the sister-kinetochore pairs along the spindle axis of *siControl* (black bars, same as in Figure 1b) and *siCENP-H-2* (red bars). For each condition, the mean values and SDs are indicated. **(d)** Average sister-kinetochore pair speed along the spindle axis of *siControl* (black bar; same as in Figure 1b) and *siCENP-H-2* (red bar). Error bars represent SD based on  $n =$

independent experiments. **(e)** Width of the metaphase plate of *siControl* (black bar; same as in Figure 1b) and *siCENP-H-2* (red bar). Error bars represent SD based on  $n =$  independent experiments. **(f)** Representative images of *siControl* and *siCENP-H-2* cold-treated cells for 10 or 30 min stained with CREST antisera (kinetochores; red) and  $\alpha$ -tubulin antibodies (MTs; green). **(g)** Fluorescence intensity decay of the photoactivated regions over time in *siControl* (black; same as in Figure 2) and *siCENP-H-2* treated PAGFP- $\alpha$ -tubulin/H2B-mRFP cells. Curve fitting indicated that the decay in CENP-H-2 depleted cells fitted to a curve with single exponential with the indicated half-life. Error bars represent SD **(h)** Representative images of HeLa cells stably expressing EGFP-CLASP1 treated with *siControl* or *siCENP-H-2* RNAs and stained with CREST antisera (kinetochores; red). Scale bars = 10  $\mu$ m

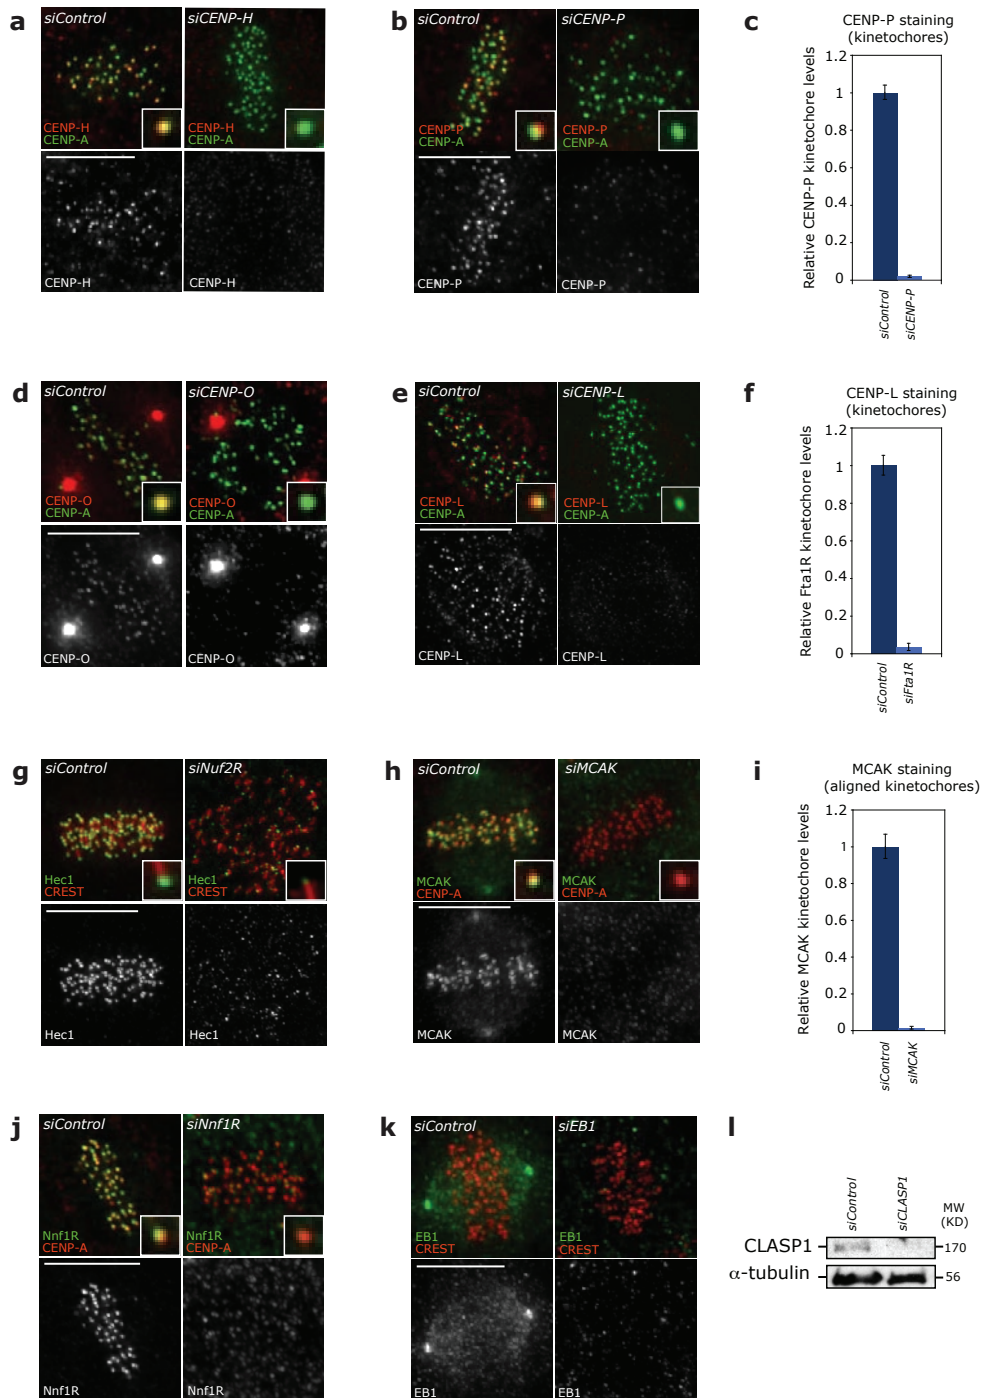

**Figure S5** siRNA depletions and antibody validations (**a, b, d, e, g, h, j, k**) Representative images of *siControl* and *siCENP-H* (**a**), *siCENP-P* (**b**), *siCENP-O* (**d**), *siCENP-L* (**e**), *siNuf2R* (**g**), *siMCAK* (**h**), *siNnf1R* (**j**) or *siEB1* (**k**) RNA-treated cells stained with CREST or CENP-A (red) and CENP-H (**a**), CENP-P (**b**), CENP-O (**d**), CENP-L (**e**), Nuf2R (**g**), MCAK (**h**), Nnf1R (**j**) or EB1 (**k**) antisera (green). Insets show higher magnification views

of a single kinetochore. (**c, f, i**) Immunofluorescence quantification of CENP-P (**c**), CENP-L (**f**) and MCAK (**i**) levels on aligned kinetochores after treatment with *siControl* and *siCENP-P*, *siCENP-L* or *siMCAK* RNAs from CLASP1 depletion. Error bars indicate SEM (**l**) Validation of CLASP1 depletion. Immunoblots of whole cell lysates treated with siRNAs as indicated and probed with CLASP1 or  $\alpha$ -tubulin antibodies are shown.

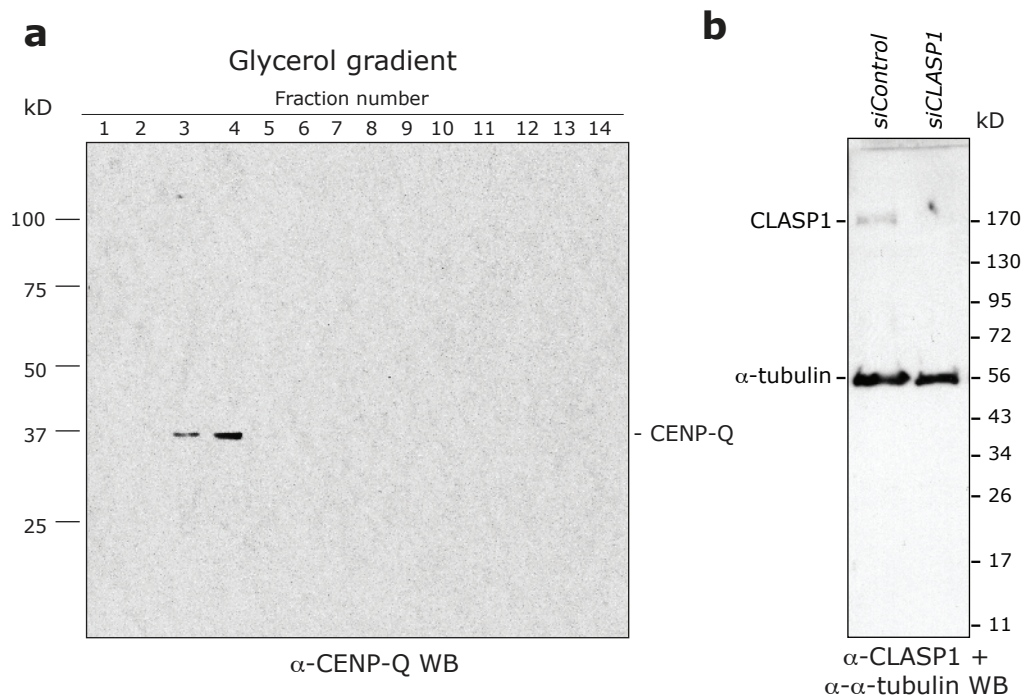

**Figure S6** Top-bottom gels of cropped immunoblots (a) Immunoblot of 5-40% glycerol gradient shown in Figure 7d probed with anti-CENP-Q antibodies. (b) Validation of CLASP1 depletion. Immunoblots of whole

cell lysates treated with siRNAs as indicated and probed with CLASP1 or α-tubulin antibodies are shown. The cropped version is shown in Supplementary Figure S5l.

**Supplementary movie legends**

**Supplementary Video S1:** Poleward MT flux and tubulin turnover following photoactivation of PA-GFP- $\alpha$ -tubulin in a Control-depleted cell.

**Supplementary Video S2:** Poleward MT flux and tubulin turnover following photoactivation of PA-GFP- $\alpha$ -tubulin in a CENP-H-depleted cell.

**Supplementary Video S3:** Oscillating sister-kinetochore pair in an EGFP-CENP-I stable cell line.

## Supplementary Tables

**Supplementary Table 1.** Qualitative levels of EB1 and CLASP1 at the kinetochores<sup>a</sup>

| Protein/Condition | <i>siControl</i> | <i>siNuf2R</i> | <i>siNnf1R</i>  | <i>siCENP-H</i> |
|-------------------|------------------|----------------|-----------------|-----------------|
| EB1               | +++ <sup>c</sup> | +++            | ++ <sup>d</sup> | ++              |
| CLASP1            | +++              | +++            | ++              | - <sup>b</sup>  |

<sup>a</sup>as determined by immunofluorescence

<sup>b</sup>no signal

<sup>c</sup>weak signal

<sup>d</sup>reduced signal compared to control cells

<sup>e</sup>normal signal

**Supplementary Table 2.** Number of imaged cells and sister kinetochore pairs used for the kinetochore tracking analysis

| Condition         | N <sup>o</sup> of cells | N <sup>o</sup> sister KT pairs |
|-------------------|-------------------------|--------------------------------|
| <i>siControl</i>  | 95                      | 2636                           |
| <i>siCENP-H</i>   | 112                     | 3573                           |
| <i>siCENP-H-2</i> | 41                      | 1213                           |
| Fixed Cells       | 48                      | 1533                           |
